# Supplementary material for: Pandemic Stringency Measures and Hospital Admissions for Eating Disorders
Source: PubMed Central journal article supplement (PMC11231909; doi:10.1001/jamapediatrics.2024.2044), 2024-07-08
Supplement: jamapediatr-e242044-s001.pdf [file jamapediatr-e242044-s001.pdf]

## Supplementary Online Content

Roumeliotis N, Carwana M, Charland K, et al. Pandemic stringency measures and hospital admissions for eating disorders. *JAMA Pediatr*. Published online July 8, 2024.  
doi:10.1001/jamapediatrics.2024.2044

**eTable 1.** Policies Included in the Bank of Canada's Stringency Index

**eFigure 1.** Bank of Canada's daily stringency index by region

**eFigure 2.** Aggregation of Cases by Canadian Region

**eTable 2.** Descriptive Characteristics of Hospitalizations for Eating Disorders Age 6 to 20 Years, by Fiscal Year in Canada (N=11 289)

**eTable 3.** Canadian Population Aged 6 to 20 for Each Fiscal Year From 2016 to 2022 Stratified by Region, Sex and Age Group

**eTable 4.** Unadjusted Incidence Rate Ratios (IRR) for Eating Disorders, Comparing Hospitalization Rates in Pre-COVID and COVID-Prevalent Years, Stratified by Region, Sex and Age

**eFigure 3.** Interrupted Time Series of Fitted vs. Expected Rates of Eating Disorder Hospitalizations Among Females 12 to 17 Years of Age, by Region and 4-Week Period, From Pre-pandemic Trends

**eTable 5.** Change in Volume of Eating Disorder Hospitalizations Among Females 12 to 17 Years, Comparing the Pre-pandemic Trend From the Regression Model Extrapolated Into the COVID-Prevalent Period and the Fitted Rate

**eTable 6.** Sensitivity Analysis, Varying the Lag of the Stringency and the Duration of the Healthcare Restriction

This supplementary material has been provided by the authors to give readers additional information about their work.

**eTable 1. Policies included in the Bank of Canada’s stringency index**

| Identifier                                                                            |
|---------------------------------------------------------------------------------------|
| School and university closures                                                        |
| Workplace and office closures                                                         |
| Public event cancellations and restrictions                                           |
| Restrictions on private gatherings                                                    |
| Public transport closures                                                             |
| Stay-at-home requirements                                                             |
| Restrictions on intra-provincial travel (between cities or regions within a province) |
| Restrictions on international travel                                                  |
| Restrictions on interprovincial travel (between provinces)                            |
| Enforcement mechanisms for individuals                                                |
| Enforcement mechanisms for firms                                                      |
| Public information campaigns                                                          |

Policies are measured in all 10 Canadian Provinces but not in Territories.  
 Model creation, data and code book can be found at link below.  
 Source: <https://www.bankofcanada.ca/2021/02/staff-analytical-note-2021-1/#table1>

**eFigure 1. Bank of Canada’s daily stringency index by region**

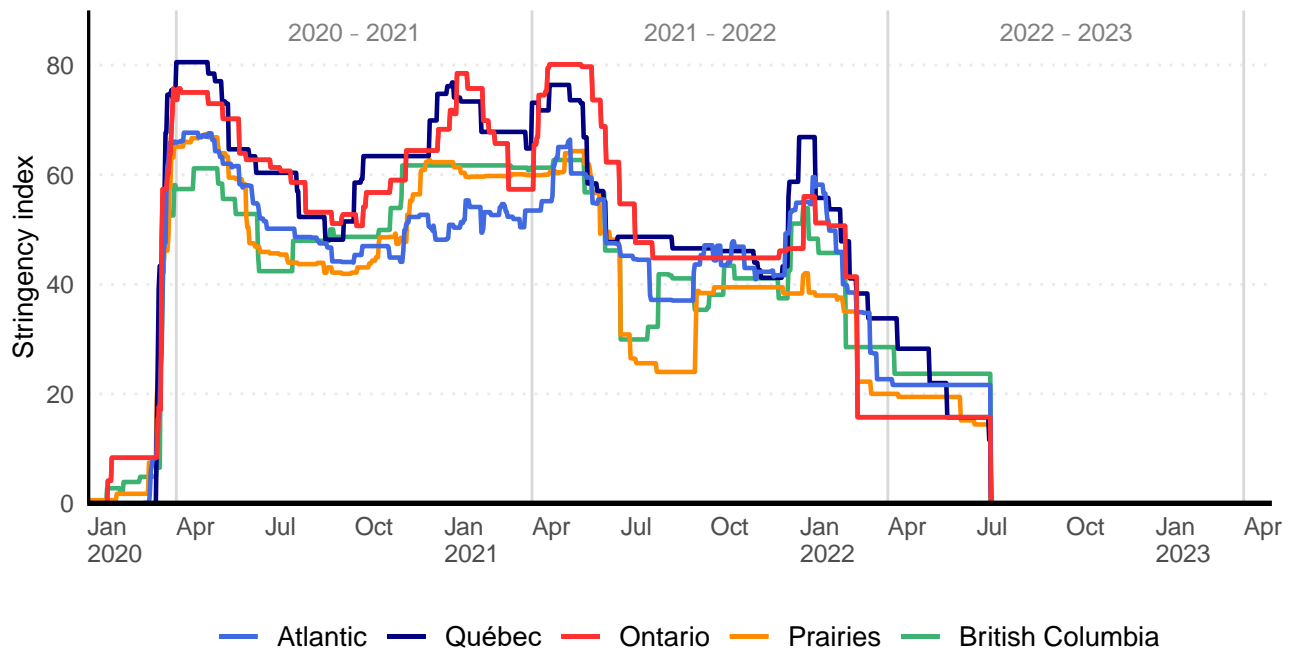

**eFigure 2. Aggregation of cases by Canadian region.**

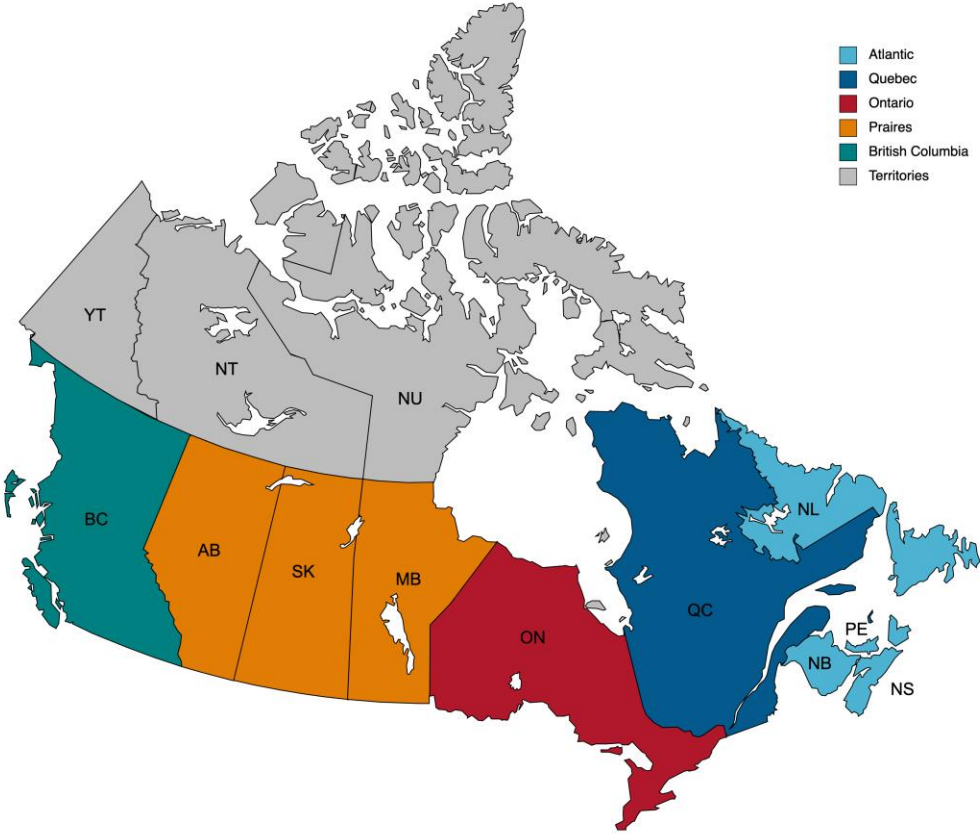

Created with mapchart.net

BC: British Columbia, AB: Alberta, SK: Saskatchewan, MB: Manitoba, ON: Ontario, Qc: Quebec, NL: Newfoundland, NB: New Brunswick, PE: Prince Edward Island, NS: Nova Scotia, YT: Yukon Territory, NT Northwest Territory, NU: Nunavut Territory

**eTable 2. Descriptive characteristics of hospitalizations for eating disorders age 6 to 20 years, by fiscal year in Canada (N=11 289)**

|                                       | Fiscal Year |             |             |             |             |             |             |
|---------------------------------------|-------------|-------------|-------------|-------------|-------------|-------------|-------------|
|                                       | 2016-17     | 2017-18     | 2018-19     | 2019-20     | 2020-21     | 2021-22     | 2022-23     |
| Total Hospitalizations N              | 1200        | 1192        | 1298        | 1294        | 2082        | 2347        | 1876        |
| Age category, n (%)                   |             |             |             |             |             |             |             |
| 6 - 11 years                          | 71 (5.9)    | 87 (7.3)    | 93 (7.2)    | 77 (5.9)    | 117 (5.6)   | 120 (5.1)   | 110 (5.9)   |
| 12 - 17 years                         | 985 (82.1)  | 982 (82.4)  | 1059 (81.6) | 1076 (83.1) | 1789 (85.9) | 2040 (86.9) | 1627 (86.7) |
| 18 - 20 years                         | 144 (12.0)  | 123 (10.3)  | 146 (11.2)  | 141 (10.9)  | 176 (8.4)   | 187 (8.0)   | 139 (7.4)   |
| Sex <sup>a</sup> , n (%)              |             |             |             |             |             |             |             |
| Female                                | 1092 (91.1) | 1067 (89.5) | 1157 (89.1) | 1163 (89.9) | 1909 (91.8) | 2160 (92.1) | 1663 (88.6) |
| Male                                  | 107 (8.9)   | 125 (10.5)  | 141 (10.9)  | 130 (10.0)  | 171 (8.2)   | 185 (7.9)   | 213 (11.4)  |
| Area <sup>b</sup> , n (%)             |             |             |             |             |             |             |             |
| Urban                                 | 1026 (86.7) | 1021 (86.4) | 1134 (88.7) | 1128 (88.7) | 1809 (88.4) | 2024 (87.5) | 1627 (88.0) |
| Rural                                 | 158 (13.3)  | 161 (13.6)  | 144 (11.3)  | 144 (11.3)  | 238 (11.6)  | 290 (12.5)  | 221 (12.0)  |
| Region, n (%)                         |             |             |             |             |             |             |             |
| British Columbia                      | 173 (14.4)  | 177 (14.8)  | 199 (15.3)  | 212 (16.4)  | 317 (15.2)  | 282 (12.0)  | 216 (11.5)  |
| Prairies                              | 146 (12.2)  | 130 (10.9)  | 153 (11.8)  | 146 (11.3)  | 216 (10.4)  | 268 (11.4)  | 200 (10.7)  |
| Ontario                               | 493 (41.1)  | 505 (42.4)  | 534 (41.1)  | 551 (42.6)  | 918 (44.1)  | 1054 (44.9) | 860 (45.8)  |
| Quebec                                | 325 (27.1)  | 298 (25.0)  | 330 (25.4)  | 301 (23.3)  | 512 (24.6)  | 612 (26.1)  | 515 (27.4)  |
| Atlantic                              | 61 (5.1)    | 82 (6.9)    | 79 (6.1)    | 84 (6.5)    | 115 (5.5)   | 122 (5.2)   | 81 (4.3)    |
| Territories                           | N/R         | 0 (0.0)     | N/R         | 0 (0.0)     | N/R         | 9 (0.4)     | N/R         |
| Pediatric center <sup>c</sup> , n (%) |             |             |             |             |             |             |             |
| Yes                                   | 666 (55.5)  | 662 (55.5)  | 739 (56.9)  | 761 (58.8)  | 1245 (59.8) | 1295 (55.2) | 1023 (54.5) |
| No                                    | 534 (44.5)  | 530 (44.5)  | 559 (43.1)  | 533 (41.2)  | 837 (40.2)  | 1052 (44.8) | 853 (45.5)  |
| Length of stay days, med (IQR)        |             |             |             |             |             |             |             |
| Quebec                                | 28 (10-50)  | 27 (12-52)  | 26 (12-47)  | 25 (10-49)  | 21 (10-36)  | 20 (11-42)  | 23 (11-42)  |

|                                                         | <b>2016-17</b> | <b>2017-18</b> | <b>2018-19</b> | <b>2019-20</b> | <b>2020-21</b> | <b>2021-22</b> | <b>2022-23</b> |
|---------------------------------------------------------|----------------|----------------|----------------|----------------|----------------|----------------|----------------|
| All other provinces                                     | 16 (8-35)      | 17 (8-34)      | 16 (7-31)      | 14 (7-30)      | 14 (7-24)      | 13 (7-25)      | 13 (6-22)      |
| Transfer during admission, n (%)                        | 100 (8.3)      | 105 (8.8)      | 113 (8.7)      | 87 (6.7)       | 171 (8.2)      | 195 (8.3)      | 170 (9.1)      |
| Previous Mental Health History in last 2 years, n (%)   |                |                |                |                |                |                |                |
| Emergency Department visit                              | 214 (17.8)     | 217 (18.2)     | 232 (17.8)     | 243 (18.8)     | 390 (18.7)     | 491 (20.9)     | 395 (21.1)     |
| Hospitalization                                         | 403 (33.6)     | 381 (32.0)     | 456 (35.1)     | 459 (35.5)     | 602 (28.9)     | 694 (29.6)     | 615 (32.8)     |
| None                                                    | 583 (48.6)     | 594 (49.8)     | 610 (47.0)     | 592 (45.7)     | 1090 (52.3)    | 1162 (49.5)    | 866 (46.1)     |
| Previous Eating Disorder History in last 2 years, n (%) |                |                |                |                |                |                |                |
| Emergency Department visit                              | 116 (9.7)      | 130 (10.9)     | 160 (12.3)     | 134 (10.4)     | 251 (12.1)     | 346 (14.7)     | 261 (13.9)     |
| Hospitalization                                         | 377 (31.4)     | 339 (28.4)     | 409 (31.5)     | 404 (31.2)     | 557 (26.8)     | 629 (26.8)     | 561 (29.9)     |
| None                                                    | 707 (58.9)     | 723 (60.7)     | 729 (56.2)     | 756 (58.4)     | 1274 (61.2)    | 1372 (58.5)    | 1054 (56.2)    |

N/R: Not reported, Cell count less than 5. Med: median. IQR: Interquartile range

- a. N=6 (0.1%) reported as 'Other'
- b. N=164 (1.5%) missing, non-urban refers to rural or remote areas.
- c. admission to a pediatric center is defined as a center having a tertiary care pediatric intensive care unit.

**eTable 3. Canadian population aged 6 to 20 for each fiscal year from 2016 to 2022 stratified by region, sex and age group**

| Strata          | Fiscal year    |                |                |                |                |                |                |
|-----------------|----------------|----------------|----------------|----------------|----------------|----------------|----------------|
|                 | 2016-17        | 2017-18        | 2018-19        | 2019-20        | 2020-21        | 2021-22        | 2022-23        |
| <b>CANADA</b>   | <b>6076121</b> | <b>6123912</b> | <b>6202774</b> | <b>6269212</b> | <b>6304676</b> | <b>6261795</b> | <b>6390438</b> |
| Male            | <b>3112552</b> | <b>3136107</b> | <b>3174420</b> | <b>3207157</b> | <b>3223202</b> | <b>3198994</b> | <b>3264647</b> |
| 6-11 years      | 1209769        | 1228741        | 1248146        | 1262585        | 1268726        | 1266731        | 1281344        |
| 12-17 years     | 1212060        | 1211455        | 1213881        | 1226568        | 1244756        | 1256990        | 1286474        |
| 18-20 years     | 690723         | 695911         | 712393         | 718004         | 709720         | 675273         | 696829         |
| Female          | <b>2963569</b> | <b>2987805</b> | <b>3028354</b> | <b>3062055</b> | <b>3081474</b> | <b>3062801</b> | <b>3125791</b> |
| 6-11 years      | 1167196        | 1184060        | 1200921        | 1211683        | 1214957        | 1211146        | 1222797        |
| 12-17 years     | 1153532        | 1157750        | 1165306        | 1180381        | 1199791        | 1211903        | 1241658        |
| 18-20 years     | 642841         | 645995         | 662127         | 669991         | 666726         | 639752         | 661336         |
| <b>ATLANTIC</b> | <b>371143</b>  | <b>371315</b>  | <b>372064</b>  | <b>373681</b>  | <b>374663</b>  | <b>371136</b>  | <b>380438</b>  |
| Male            | <b>190531</b>  | <b>190544</b>  | <b>190541</b>  | <b>191335</b>  | <b>191835</b>  | <b>190046</b>  | <b>194874</b>  |
| 6-11 years      | 72554          | 73143          | 73494          | 73614          | 73492          | 73136          | 74127          |
| 12-17 years     | 75590          | 74970          | 74180          | 74694          | 75479          | 76052          | 78319          |
| 18-20 years     | 42387          | 42431          | 42867          | 43027          | 42864          | 40858          | 42428          |
| Female          | <b>180612</b>  | <b>180771</b>  | <b>181523</b>  | <b>182346</b>  | <b>182828</b>  | <b>181090</b>  | <b>185564</b>  |
| 6-11 years      | 69117          | 69833          | 70310          | 70523          | 70153          | 69623          | 70462          |
| 12-17 years     | 72195          | 71774          | 71486          | 71803          | 72708          | 72828          | 74956          |
| 18-20 years     | 39300          | 39164          | 39727          | 40020          | 39967          | 38639          | 40146          |
| <b>QUEBEC</b>   | <b>1287873</b> | <b>1296080</b> | <b>1313282</b> | <b>1335353</b> | <b>1356037</b> | <b>1357072</b> | <b>1375050</b> |
| Male            | <b>657425</b>  | <b>661613</b>  | <b>669798</b>  | <b>681648</b>  | <b>692394</b>  | <b>692376</b>  | <b>701118</b>  |
| 6-11 years      | 265013         | 272364         | 279712         | 285309         | 288107         | 286582         | 286997         |
| 12-17 years     | 249068         | 249046         | 251467         | 256716         | 263362         | 269842         | 277749         |
| 18-20 years     | 143344         | 140203         | 138619         | 139623         | 140925         | 135952         | 136372         |
| Female          | <b>630448</b>  | <b>634467</b>  | <b>643484</b>  | <b>653705</b>  | <b>663643</b>  | <b>664696</b>  | <b>673932</b>  |
| 6-11 years      | 255700         | 262480         | 269236         | 273928         | 276527         | 275127         | 274788         |
| 12-17 years     | 238304         | 238718         | 241699         | 247216         | 253797         | 260305         | 268208         |
| 18-20 years     | 136444         | 133269         | 132549         | 132561         | 133319         | 129264         | 130936         |
| <b>ONTARIO</b>  | <b>2402088</b> | <b>2417569</b> | <b>2447055</b> | <b>2462779</b> | <b>2463205</b> | <b>2427970</b> | <b>2473364</b> |
| Male            | <b>1230055</b> | <b>1238571</b> | <b>1253947</b> | <b>1260674</b> | <b>1259568</b> | <b>1240538</b> | <b>1264729</b> |
| 6-11 years      | 465301         | 468169         | 472137         | 474329         | 473904         | 472380         | 477648         |
| 12-17 years     | 484245         | 484370         | 484198         | 486832         | 490526         | 490505         | 496792         |
| 18-20 years     | 280509         | 286032         | 297612         | 299513         | 295138         | 277653         | 290289         |
| Female          | <b>1172033</b> | <b>1178998</b> | <b>1193108</b> | <b>1202105</b> | <b>1203637</b> | <b>1187432</b> | <b>1208635</b> |
| 6-11 years      | 449586         | 451747         | 455323         | 456864         | 455941         | 453832         | 457626         |
| 12-17 years     | 461074         | 462563         | 464126         | 467408         | 471293         | 471419         | 478197         |
| 18-20 years     | 261373         | 264688         | 273659         | 277833         | 276403         | 262181         | 272812         |
| <b>PRAIRIES</b> | <b>1228499</b> | <b>1245378</b> | <b>1265485</b> | <b>1285536</b> | <b>1299256</b> | <b>1303823</b> | <b>1336771</b> |
| Male            | <b>629454</b>  | <b>637719</b>  | <b>647833</b>  | <b>658195</b>  | <b>664837</b>  | <b>666637</b>  | <b>683019</b>  |
| 6-11 years      | 256786         | 262983         | 268456         | 272752         | 274926         | 275216         | 279841         |

|                         |               |               |               |               |               |               |               |
|-------------------------|---------------|---------------|---------------|---------------|---------------|---------------|---------------|
| 12-17 years             | 243480        | 244464        | 246327        | 250280        | 256084        | 261157        | 269501        |
| 18-20 years             | 129188        | 130272        | 133050        | 135163        | 133827        | 130264        | 133677        |
| Female                  | <b>599045</b> | <b>607659</b> | <b>617652</b> | <b>627341</b> | <b>634419</b> | <b>637186</b> | <b>653752</b> |
| 6-11 years              | 247975        | 253557        | 257904        | 260944        | 262334        | 262400        | 267108        |
| 12-17 years             | 231822        | 233576        | 236263        | 241292        | 247636        | 252549        | 260408        |
| 18-20 years             | 119248        | 120526        | 123485        | 125105        | 124449        | 122237        | 126236        |
| <b>BRITISH COLUMBIA</b> | <b>761074</b> | <b>767814</b> | <b>778780</b> | <b>785448</b> | <b>784535</b> | <b>774495</b> | <b>797195</b> |
| Male                    | <b>392093</b> | <b>394594</b> | <b>399092</b> | <b>402000</b> | <b>401000</b> | <b>395653</b> | <b>406988</b> |
| 6-11 years              | 144599        | 146456        | 148615        | 150769        | 152389        | 153412        | 156716        |
| 12-17 years             | 154801        | 153680        | 152777        | 153030        | 154109        | 154102        | 158650        |
| 18-20 years             | 92693         | 94458         | 97700         | 98201         | 94502         | 88139         | 91622         |
| Female                  | <b>368981</b> | <b>373220</b> | <b>379688</b> | <b>383448</b> | <b>383535</b> | <b>378842</b> | <b>390207</b> |
| 6-11 years              | 139547        | 141010        | 142609        | 143762        | 144241        | 144315        | 147034        |
| 12-17 years             | 145329        | 146197        | 146786        | 147638        | 149213        | 149550        | 154484        |
| 18-20 years             | 84105         | 86013         | 90293         | 92048         | 90081         | 84977         | 88689         |
| <b>TERRITORIES</b>      | <b>25444</b>  | <b>25756</b>  | <b>26108</b>  | <b>26415</b>  | <b>26980</b>  | <b>27299</b>  | <b>27620</b>  |
| Male                    | <b>12994</b>  | <b>13066</b>  | <b>13209</b>  | <b>13305</b>  | <b>13568</b>  | <b>13744</b>  | <b>13919</b>  |
| 6-11 years              | 5516          | 5626          | 5732          | 5812          | 5908          | 6005          | 6015          |
| 12-17 years             | 4876          | 4925          | 4932          | 5016          | 5196          | 5332          | 5463          |
| 18-20 years             | 2602          | 2515          | 2545          | 2477          | 2464          | 2407          | 2441          |
| Female                  | <b>12450</b>  | <b>12690</b>  | <b>12899</b>  | <b>13110</b>  | <b>13412</b>  | <b>13555</b>  | <b>13701</b>  |
| 6-11 years              | 5271          | 5433          | 5539          | 5662          | 5761          | 5849          | 5779          |
| 12-17 years             | 4808          | 4922          | 4946          | 5024          | 5144          | 5252          | 5405          |
| 18-20 years             | 2371          | 2335          | 2414          | 2424          | 2507          | 2454          | 2517          |

**eTable 4. Unadjusted incidence rate ratios (IRR) for eating disorders, comparing hospitalization rates in pre-COVID and COVID-prevalent years, stratified by region, sex and age.**

| Region                  | Pre-COVID<br>Rate per 100 000 | IRR (95%CI)<br>2020 – 2021 | IRR (95%CI)<br>2021 – 2022 | IRR (95%CI)<br>2022 – 2023 |
|-------------------------|-------------------------------|----------------------------|----------------------------|----------------------------|
| <b>CANADA</b>           | 20.19                         | 1.63 (1.55-1.72)           | 1.85 (1.75-1.95)           | 1.45 (1.38-1.53)           |
| Male                    | 3.98                          | 1.33 (1.11-1.59)           | 1.45 (1.22-1.72)           | 1.64 (1.39-1.93)           |
| Female                  | 37.20                         | 1.67 (1.58-1.76)           | 1.90 (1.80-2.00)           | 1.43 (1.35-1.51)           |
| 6-11 years              | 4.87                          | 1.52 (1.18-1.95)           | 1.56 (1.21-1.99)           | 1.41 (1.09-1.82)           |
| 12-17 years             | 80.10                         | 1.72 (1.62-1.82)           | 1.95 (1.84-2.06)           | 1.46 (1.37-1.55)           |
| 18-20 years             | 19.73                         | 1.26 (1.05-1.51)           | 1.40 (1.18-1.67)           | 0.97 (0.80-1.18)           |
| <b>ATLANTIC</b>         | 20.56                         | 1.49 (1.19-1.86)           | 1.60 (1.29-1.98)           | 1.04 (0.80-1.33)           |
| Male                    | 3.41                          | 1.07 (0.39-2.53)           | 1.70 (0.76-3.56)           | 1.51 (0.65-3.23)           |
| Female                  | 38.61                         | 1.53 (1.21-1.92)           | 1.59 (1.26-1.98)           | 0.99 (0.72-1.29)           |
| 6-11 years              | --                            | --                         | --                         | --                         |
| 12-17 years             | 74.50                         | 1.50 (1.14-1.94)           | 1.51 (1.16-1.96)           | 0.91 (0.66-1.24)           |
| 18-20 years             | 32.24                         | 1.79 (1.04-2.97)           | 2.17 (1.31-3.52)           | 1.08 (0.55-1.98)           |
| <b>QUEBEC</b>           | 23.97                         | 1.58 (1.42-1.75)           | 1.88 (1.71-2.07)           | 1.56 (1.41-1.73)           |
| Male                    | 3.82                          | 1.40 (0.93-2.06)           | 1.25 (0.82-1.86)           | 1.98 (1.39-2.78)           |
| Female                  | 44.96                         | 1.59 (1.43-1.77)           | 1.94 (1.75-2.14)           | 1.52 (1.37-1.70)           |
| 6-11 years              | 4.05                          | 2.59 (1.56-4.24)           | 2.51 (1.50-4.14)           | 1.98 (1.13-3.38)           |
| 12-17 years             | 101.66                        | 1.57 (1.39-1.76)           | 1.92 (1.72-2.14)           | 1.50 (1.33-1.69)           |
| 18-20 years             | 23.75                         | 1.33 (0.91-1.89)           | 1.37 (0.94-1.95)           | 1.00 (0.65-1.49)           |
| <b>ONTARIO</b>          | 21.41                         | 1.74 (1.61-1.88)           | 2.03 (1.88-2.18)           | 1.62 (1.50-1.76)           |
| Male                    | 5.24                          | 1.27 (0.98-1.63)           | 1.59 (1.25-2.00)           | 1.66 (1.32-2.08)           |
| Female                  | 38.37                         | 1.80 (1.66-1.96)           | 2.08 (1.92-2.25)           | 1.62 (1.48-1.76)           |
| 6-11 years              | 6.73                          | 1.08 (0.71-1.59)           | 1.21 (0.82-1.76)           | 1.20 (0.81-1.75)           |
| 12-17 years             | 88.67                         | 1.86 (1.71-2.03)           | 2.12 (1.95-2.30)           | 1.62 (1.48-1.78)           |
| 18-20 years             | 5.01                          | 1.44 (0.82-2.45)           | 1.98 (1.19-3.22)           | 1.76 (1.04-2.89)           |
| <b>PRAIRIES</b>         | 11.44                         | 1.45 (1.24-1.70)           | 1.80 (1.55-2.08)           | 1.31 (1.11-1.54)           |
| Male                    | 1.71                          | 0.70 (0.29-1.51)           | 1.75 (0.98-3.04)           | 2.05 (1.20-3.45)           |
| Female                  | 21.66                         | 1.51 (1.28-1.78)           | 1.80 (1.54-2.09)           | 1.24 (1.04-1.48)           |
| 6-11 years              | 2.65                          | 2.16 (1.07-4.21)           | 2.02 (0.98-3.98)           | 1.41 (0.61-3.02)           |
| 12-17 years             | 36.91                         | 1.77 (1.46-2.14)           | 2.15 (1.79-2.56)           | 1.50 (1.23-1.82)           |
| 18-20 years             | 31.94                         | 0.78 (0.51-1.15)           | 0.87 (0.58-1.27)           | 0.55 (0.33-0.86)           |
| <b>BRITISH COLUMBIA</b> | 24.60                         | 1.64 (1.44-1.87)           | 1.48 (1.29-1.70)           | 1.10 (0.94-1.28)           |
| Male                    | 4.41                          | 1.98 (1.28-3.01)           | 1.03 (0.58-1.75)           | 0.89 (0.48-1.55)           |
| Female                  | 45.84                         | 1.60 (1.39-1.85)           | 1.52 (1.31-1.75)           | 1.12 (0.95-1.31)           |
| 6-11 years              | 4.41                          | 1.41 (0.58-3.13)           | 1.73 (0.77-3.64)           | 1.39 (0.57-3.07)           |
| 12-17 years             | 91.48                         | 1.63 (1.39-1.91)           | 1.51 (1.28-1.77)           | 1.10 (0.91-1.31)           |
| 18-20 years             | 36.60                         | 1.52 (1.07-2.12)           | 1.51 (1.06-2.13)           | 1.11 (0.74-1.62)           |
| <b>TERRITORIES</b>      | --                            | --                         | --                         | --                         |

IRR: Incidence Rate Ratio. N/R: Not reported as counts too low.



Fiscal years are April 1st to March 31<sup>st</sup>.  
Males not stratified by age groups as counts too low.  
Territories not reported as sex stratified counts per year too low.

**eFigure 3. Interrupted time series of fitted vs. expected rates of eating disorder hospitalizations among females 12 to 17 years of age, by region and 4-week period, from pre-pandemic trends**

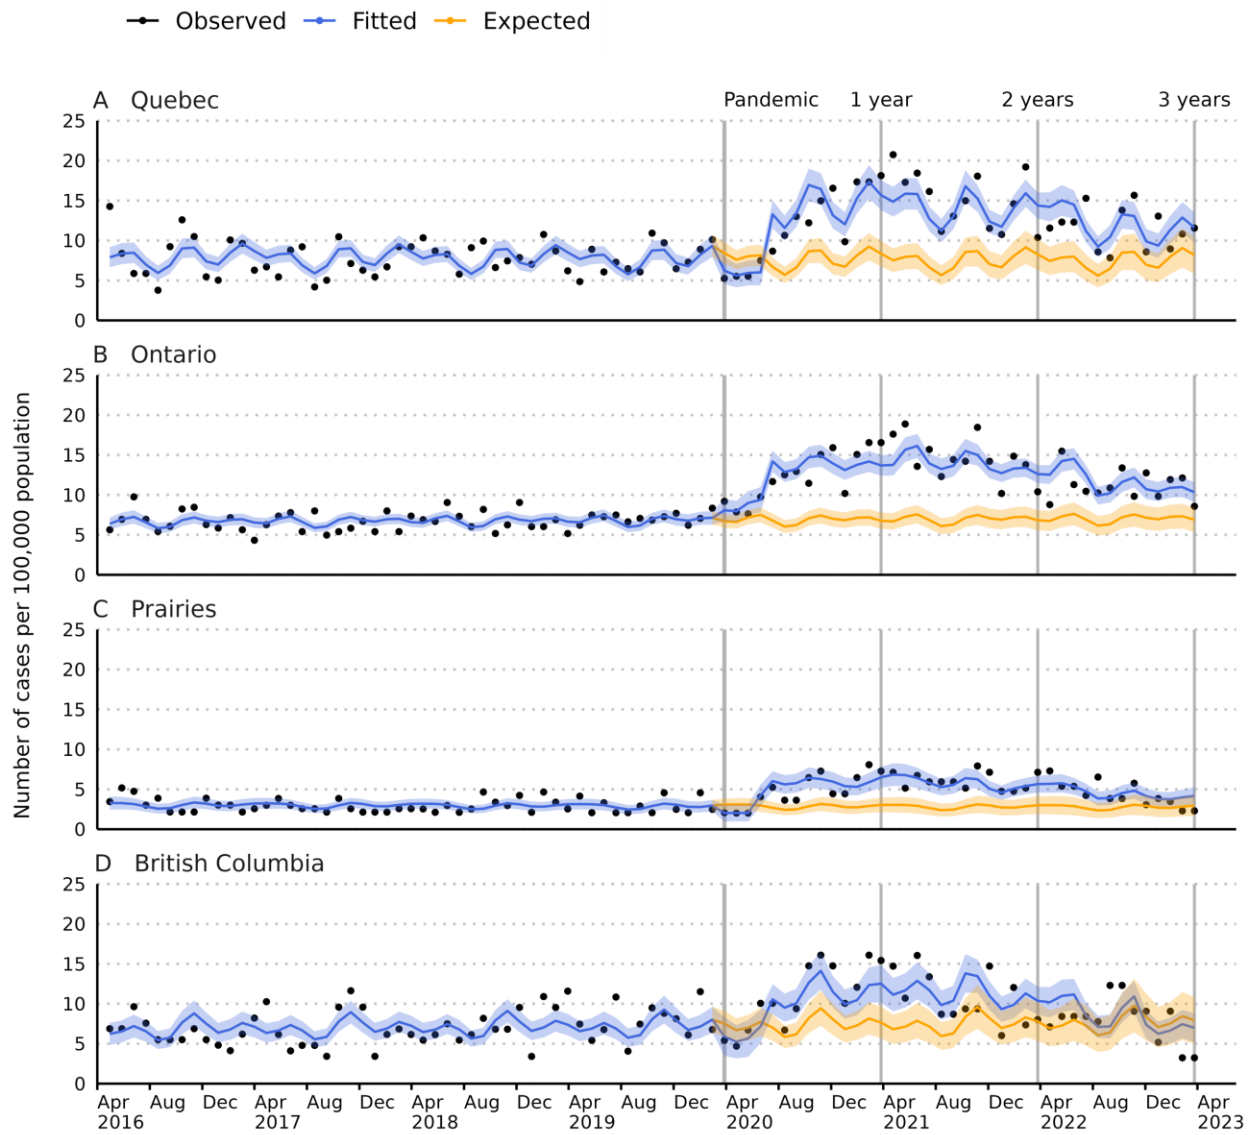

The shaded areas represent the 95% confidence interval for the fitted curve (blue) and the expected curve (orange). Series runs from April 2016 to March 2023.

**eTable 5. Change in volume of eating disorder hospitalizations among females 12 to 17 years, comparing the pre-pandemic trend from the regression model extrapolated into the COVID-prevalent period and the fitted rate.**

| Region                  | Expected rate per 100,000 population | Fitted rate per 100,000 population | Rate ratio |
|-------------------------|--------------------------------------|------------------------------------|------------|
| <b>Quebec</b>           |                                      |                                    |            |
| 1 year                  | 8.34                                 | 15.68                              | 1.88       |
| 2 years                 | 8.26                                 | 14.38                              | 1.74       |
| 3 years                 | 8.18                                 | 11.62                              | 1.42       |
| <b>Ontario</b>          |                                      |                                    |            |
| 1 year                  | 6.77                                 | 13.69                              | 2.02       |
| 2 years                 | 6.83                                 | 12.61                              | 1.85       |
| 3 years                 | 6.89                                 | 10.33                              | 1.50       |
| <b>Prairies</b>         |                                      |                                    |            |
| 1 year                  | 3.04                                 | 6.50                               | 2.14       |
| 2 years                 | 3.00                                 | 5.65                               | 1.88       |
| 3 years                 | 2.96                                 | 4.16                               | 1.41       |
| <b>British Columbia</b> |                                      |                                    |            |
| 1 year                  | 7.65                                 | 12.51                              | 1.64       |
| 2 years                 | 7.78                                 | 10.36                              | 1.33       |
| 3 years                 | 7.92                                 | 6.99                               | 0.88       |

Pandemic start is April 1st, 2020.

**eTable 6. Sensitivity analysis, varying the lag of the stringency and the duration of the healthcare restriction.**

| Model parameters              |                | BG test p-value |         |         | BIC    | Exp(coefficient) for the stringency index (95%CI) |
|-------------------------------|----------------|-----------------|---------|---------|--------|---------------------------------------------------|
| Healthcare restriction period | Stringency lag | Order 1         | Order 2 | Order 3 |        |                                                   |
| <b>Quebec</b>                 |                |                 |         |         |        |                                                   |
| 12 weeks                      | 12 weeks       | 0.1037          | 0.2108  | 0.2238  | 622.74 | 1.04 (1.01-1.06) *                                |
|                               | 16 weeks       | 0.1257          | 0.2111  | 0.2438  | 611.45 | 1.06 (1.03-1.08) ***                              |
|                               | 20 weeks       | 0.4182          | 0.6746  | 0.6144  | 607.04 | 1.06 (1.03-1.09) ***                              |
| 16 weeks                      | 12 weeks       | 0.2916          | 0.3909  | 0.4583  | 609.75 | 1.04 (1.01-1.07) **                               |
|                               | 16 weeks       | 0.3400          | 0.4568  | 0.5188  | 609.77 | 1.05 (1.01-1.07) **                               |
|                               | 20 weeks       | 0.4401          | 0.6339  | 0.6528  | 605.69 | 1.05 (1.02-1.08) ***                              |
| <b>Ontario</b>                |                |                 |         |         |        |                                                   |
| 12 weeks                      | 12 weeks       | 0.3779          | 0.6742  | 0.4014  | 661.70 | 1.05 (1.03-1.07) ***                              |
|                               | 16 weeks       | 0.7546          | 0.9063  | 0.2620  | 656.02 | 1.05 (1.03-1.07) ***                              |
|                               | 20 weeks       | 0.7574          | 0.9380  | 0.3639  | 657.30 | 1.05 (1.03-1.07) ***                              |
| 16 weeks                      | 12 weeks       | 0.6869          | 0.9205  | 0.3910  | 652.31 | 1.05 (1.03-1.06) ***                              |
|                               | 16 weeks       | 0.9841          | 0.9681  | 0.2153  | 654.96 | 1.05 (1.03-1.07) ***                              |
|                               | 20 weeks       | 0.7598          | 0.9349  | 0.2886  | 655.44 | 1.04 (1.02-1.06) ***                              |
| <b>Prairies</b>               |                |                 |         |         |        |                                                   |
| 12 weeks                      | 12 weeks       | 0.1353          | 0.3257  | 0.3269  | 474.09 | 1.07 (1.01-1.13)                                  |
|                               | 16 weeks       | 0.1830          | 0.3357  | 0.4728  | 471.27 | 1.08 (1.03, 1.13) *                               |
|                               | 20 weeks       | 0.4571          | 0.6352  | 0.6991  | 468.95 | 1.08 (1.03-1.14) **                               |
| 16 weeks                      | 12 weeks       | 0.1906          | 0.3178  | 0.4516  | 471.64 | 1.08 (1.03-1.13) *                                |
|                               | 16 weeks       | 0.2552          | 0.3007  | 0.4827  | 473.92 | 1.07 (1.02-1.13)                                  |
|                               | 20 weeks       | 0.3217          | 0.2919  | 0.4660  | 471.47 | 1.08 (1.03-1.14) *                                |
| <b>British Columbia</b>       |                |                 |         |         |        |                                                   |
| 12 weeks                      | 12 weeks       | 0.0500          | 0.0675  | 0.0745  | 520.58 | 1.13 (1.07-1.19) ***                              |
|                               | 16 weeks       | 0.0719          | 0.1297  | 0.1499  | 527.21 | 1.11 (1.05-1.16) **                               |
|                               | 20 weeks       | 0.0420          | 0.0956  | 0.1532  | 529.91 | 1.09 (1.04-1.14)                                  |
| 16 weeks                      | 12 weeks       | 0.0540          | 0.0754  | 0.0825  | 520.49 | 1.13 (1.08-1.18) ***                              |
|                               | 16 weeks       | 0.0778          | 0.1460  | 0.1545  | 527.01 | 1.12 (1.07-1.18) **                               |
|                               | 20 weeks       | 0.0472          | 0.1228  | 0.1749  | 530.47 | 1.11 (1.05-1.16) *                                |

BG: Breusch-Godfrey test for higher-order serial correlation. BIC: Bayesian Information Criterion.

CI: Confidence Interval.

Highlighted in green: the final model selected. P-value \* <0.05 \*\* <0.01 \*\*\* <0.001
