# Supplementary material for: Pandemic Stringency Measures and Hospital Admissions for Eating Disorders
Source: PubMed Central journal article supplement (PMC11231909; doi:10.1001/jamapediatrics.2024.2044), 2024-07-08
Supplement: jamapediatr-e242044-s002.pdf [file jamapediatr-e242044-s002.pdf]

| <b>*Group Name(s): POPCORN Investigators</b> |                   |                              |                         |                                              |                                                 |                                                                   |                                                                                                   |
|----------------------------------------------|-------------------|------------------------------|-------------------------|----------------------------------------------|-------------------------------------------------|-------------------------------------------------------------------|---------------------------------------------------------------------------------------------------|
| <b>*First Name and Middle Initial(s)</b>     | <b>*Last Name</b> | <b>*Suffix (eg, Jr, III)</b> | <b>Academic Degrees</b> | <b>Institution</b>                           | <b>Location (city, state/province, country)</b> | <b>Role or Contribution, eg, chair, principal investigator</b>    | <b>Group (if more than 1 Group listed in the byline) and/or Subgroup (eg, Steering Committee)</b> |
| Sarah                                        | Ahira             |                              |                         | Maternal Infant Child Youth Research Network | Calgary, AB, Canada                             | MICYRN Clinical Research Project Manager/POPCORN Platform Manager |                                                                                                   |
| Samina                                       | Ali               |                              |                         | University of Alberta                        | Edmonton, AB, Canada                            | Indirect Consequences Project team member / Co-A UofA             |                                                                                                   |
| Upton                                        | Allen             |                              |                         | University of Toronto                        | Toronto, ON, Canada                             | EDI + I team member / Co-A SickKids                               |                                                                                                   |
| Krista                                       | Baerg             |                              |                         | University of Saskatchewan                   | Saskatoon, SK, Canada                           | PIRN site lead                                                    |                                                                                                   |
| Megan                                        | Bale-Nick         |                              |                         | University of Manitoba                       | Winnipeg, MN, Canada                            | Knowledge Broker                                                  |                                                                                                   |
| Ananya                                       | Banerjee          |                              |                         | McGill University                            | Montreal, QC, Canada                            | EDI + I team member / Co-A McGill                                 |                                                                                                   |
| Michelle                                     | Barton            |                              |                         | Western University                           | London, ON, Canada                              | ID/IMPACT site lead                                               |                                                                                                   |
| Darcy                                        | Beer              |                              |                         | University of Manitoba                       | Winnipeg, MN, Canada                            | PERC site lead / POPCORN Site PI - CHRIM                          |                                                                                                   |
| Simon                                        | Berthelot         |                              |                         | Laval University                             | Quebec city, QC, Canada                         | PERC site lead                                                    |                                                                                                   |
| Julie                                        | Bettinger         |                              |                         | University of British Columbia               | Vancouver, BC, Canada                           | Epid/ Biostats pillar team member                                 |                                                                                                   |
| Maala                                        | Bhatt             |                              |                         | University of Ottawa                         | Ottawa, ON, Canada                              | POPCORN & CURNLS site PI - CHEO                                   |                                                                                                   |
| Melanie                                      | Buba              |                              |                         | University of Ottawa                         | Ottawa, ON, Canada                              | PIRN site lead                                                    |                                                                                                   |
| Francine                                     | Buchanan          |                              |                         | University of Toronto                        | Toronto, ON, Canada                             | Patient engagement lead                                           |                                                                                                   |
| Jared                                        | Bullard           |                              |                         | University of Manitoba                       | Winnipeg, MN, Canada                            | ID/IMPACT site lead                                               |                                                                                                   |
| Brett                                        | Burstein          |                              |                         | McGill University                            | Montreal, QC, Canada                            | Acute COVID Project Lead / Scientific committee member            |                                                                                                   |
| Catherine                                    | Burton            |                              |                         | University of Alberta                        | Edmonton, AB, Canada                            | Vaccine Safety Project team member / Co-A UofA                    |                                                                                                   |
| Rahul                                        | Chanchlani        |                              |                         | McMaster University                          | Hamilton, ON, Canada                            | Longterm Outcomes Project team member / Co-A McMasters            |                                                                                                   |
| Michaël                                      | Chassé            |                              |                         | University of Montreal                       | Montreal, QC, Canada                            | Data governance team member                                       |                                                                                                   |
| Karen                                        | Choong            |                              |                         | McMaster University                          | Hamilton, ON, Canada                            | Longterm Outcomes Project Lead / Scientific committee member      |                                                                                                   |

## Supplemental Online Content: Pediatric Outcomes Improvement Through Coordination of Research Networks (POPCORN) Investigators

| *First Name and Middle Initial(s) | *Last Name        | *Suffix (eg, Jr, III) | Academic Degrees | Institution                                        | Location (city, state/province, country) | Role or Contribution, eg, chair, principal investigator                                                      | Group (if more than 1 Group listed in the byline) and/or Subgroup (eg, Steering Committee) |
|-----------------------------------|-------------------|-----------------------|------------------|----------------------------------------------------|------------------------------------------|--------------------------------------------------------------------------------------------------------------|--------------------------------------------------------------------------------------------|
| Evelyn                            | Constantin        |                       |                  | McGill University                                  | Montreal, QC, Canada                     | Mentorship and Training Director / Longterm Outcomes Project team member / PA RI-MUHC                        |                                                                                            |
| Cora                              | Constantinescu    |                       |                  | University of Calgary                              | Calgary, AB, Canada                      | ID/IMPACT site lead                                                                                          |                                                                                            |
| Carrie                            | Costello          |                       |                  | Children's Hospital Research Institute of Manitoba | Winnipeg, MN, Canada                     | Former PE Co-Lead                                                                                            |                                                                                            |
| Sylvana                           | Côté              |                       |                  | University of Montreal                             | Montreal, QC, Canada                     | Education/ social science expert - OPES                                                                      |                                                                                            |
| Tammie                            | Dewan             |                       |                  | University of Calgary                              | Calgary, AB, Canada                      | PIRN site lead                                                                                               |                                                                                            |
| Tanya                             | Di Genova         |                       |                  | McGill University                                  | Montreal, QC, Canada                     | Indirect Consequences Project team member / Co-A McGill                                                      |                                                                                            |
| Olivier                           | Drouin            |                       |                  | University of Montreal                             | Montreal, QC, Canada                     | Vaccine Safety Project team member and ECR/KM / POPCORN Site PI - CHUSJ / Knowledge mobilization Pillar lead |                                                                                            |
| Karen                             | Dryden-Palmer     |                       |                  | University of Toronto                              | Toronto, ON, Canada                      | Data governance team member                                                                                  |                                                                                            |
| Geneviève                         | Du Pont-Thibodeau |                       |                  | University of Montreal                             | Montreal, QC, Canada                     | Longterm outcomes Co-project Lead / Co-A CHUSJ                                                               |                                                                                            |
| Marc-André                        | Dugas             |                       |                  | Laval University                                   | Quebec city, QC, Canada                  | POPCORN & CURNLS site PI - CHUL / East Site Rep Scientific committee                                         |                                                                                            |
| Raven                             | Dumont-Maurice    |                       |                  | McGill University                                  | Montreal, QC, Canada                     | EDI + I team member / Collab Montreal Children's Hospital                                                    |                                                                                            |
| Guillaume                         | Emeriaud          |                       |                  | University of Montreal                             | Montreal, QC, Canada                     | Acute COVID Project member / Co-A CHUSJ                                                                      |                                                                                            |
| Jason                             | Emsley            |                       |                  | Dalhousie University                               | Halifax, NS, Canada                      | PERC site lead                                                                                               |                                                                                            |
| Mark                              | Ferro             |                       |                  | University of Waterloo                             | Waterloo, ON, Canada                     | Longterm Outcomes Project team member / Co-A UofWaterloo                                                     |                                                                                            |
| Karen                             | Forbes            |                       |                  | University of Montreal                             | Montreal, QC, Canada                     | Acute COVID Project member / Co-A UofA                                                                       |                                                                                            |
| Isabel                            | Fortier           |                       |                  | McGill University                                  | Montreal, QC, Canada                     | Data governance team member                                                                                  |                                                                                            |
| Jennifer                          | Foster            |                       |                  | Dalhousie University                               | Halifax, NS, Canada                      | POPCORN site PI - IWK                                                                                        |                                                                                            |
| Jessica                           | Foulds            |                       |                  | University of Alberta                              | Edmonton, AB, Canada                     | Longterm Outcomes Project team member / Co-A UofA                                                            |                                                                                            |

Supplemental Online Content: Pediatric Outcomes Improvement Through Coordination of Research Networks (POPCORN) Investigators

| *First Name and Middle Initial(s) | *Last Name        | *Suffix (eg, Jr, III) | Academic Degrees | Institution                                        | Location (city, state/province, country) | Role or Contribution, eg, chair, principal investigator                                              | Group (if more than 1 Group listed in the byline) and/or Subgroup (eg, Steering Committee) |
|-----------------------------------|-------------------|-----------------------|------------------|----------------------------------------------------|------------------------------------------|------------------------------------------------------------------------------------------------------|--------------------------------------------------------------------------------------------|
| Stephen                           | Freedman          |                       |                  | University of Calgary                              | Calgary, AB, Canada                      | Emergency medicine Pillar lead / POPCORN & CURNLS site PI - ACH / Scientific committee member        |                                                                                            |
| Gabrielle                         | Freire            |                       |                  | University of Toronto                              | Toronto, ON, Canada                      | Longterm Outcomes Project team member / Co-A Sickkids                                                |                                                                                            |
| Eleni                             | Galanis           |                       |                  | Public Health Agency of Canada                     | Ottawa, ON, Canada                       | Principal knowledge user Co-chair / PHAC                                                             |                                                                                            |
| Peter                             | Gill              |                       |                  | University of Toronto                              | Toronto, ON, Canada                      | Researcher and ECR rep; Acute COVID Project member/PA Sickkids / POPCORN ECR on Scientific committee |                                                                                            |
| Jocelyn                           | Gravel            |                       |                  | University of Montreal                             | Montreal, QC, Canada                     | Acute COVID Project member / Co-A CHUSJ                                                              |                                                                                            |
| Emily                             | Gruenwoldt        |                       |                  | Children's Healthcare Canada                       | Ottawa, ON, Canada                       | Knowledge User                                                                                       |                                                                                            |
| Gonzalo                           | Guerra            |                       |                  | University of Alberta                              | Edmonton, AB, Canada                     | Longterm Outcomes Project team member / Collab. UofA                                                 |                                                                                            |
| Astrid                            | Guttman           |                       |                  | Institute for Clinical Evaluative Sciences         | Toronto, ON, Canada                      | Longterm Outcomes Project team member / Collab. UofT                                                 |                                                                                            |
| Betty Jean                        | Hancock           |                       |                  | Health Sciences Centre Winnipeg                    | Winnipeg, MN, Canada                     | CCCTG site lead                                                                                      |                                                                                            |
| Robyn                             | Harrison          |                       |                  | University of Alberta                              | Edmonton, AB, Canada                     | Knowledge User - UofC                                                                                |                                                                                            |
| Joanna                            | Holland           |                       |                  | Dalhousie University                               | Halifax, NS, Canada                      | PIRN site lead                                                                                       |                                                                                            |
| Ari                               | Joffe             |                       |                  | University of Alberta                              | Edmonton, AB, Canada                     | Acute COVID Project member / Co-A Stollery                                                           |                                                                                            |
| Fatima                            | Kakkar            |                       |                  | University of Montreal                             | Montreal, QC, Canada                     | Former site PI                                                                                       |                                                                                            |
| April                             | Kam               |                       |                  | McMaster University                                | Hamilton, ON, Canada                     | PERC site lead                                                                                       |                                                                                            |
| James D.                          | Kellner           |                       |                  | University of Calgary                              | Calgary, AB, Canada                      | Scientific committee chair                                                                           |                                                                                            |
| Lisa                              | Knisley           |                       |                  | Children's Hospital Research Institute of Manitoba | Winnipeg, MN, Canada                     | Knowledge mobilization team member / co-A TREKK / CHRIM / POPCORN Early Career Researcher (ENRICH)   |                                                                                            |
| Thierry                           | Lacaze-Masmonteil |                       |                  | Maternal Infant Child Youth Research Network       | Ottawa, ON, Canada                       | Coordinating center lead/ MICYRN                                                                     |                                                                                            |

## Supplemental Online Content: Pediatric Outcomes Improvement Through Coordination of Research Networks (POPCORN) Investigators

| *First Name and Middle Initial(s) | *Last Name      | *Suffix (eg, Jr, III) | Academic Degrees | Institution                                  | Location (city, state/province, country) | Role or Contribution, eg, chair, principal investigator                                               | Group (if more than 1 Group listed in the byline) and/or Subgroup (eg, Steering Committee) |
|-----------------------------------|-----------------|-----------------------|------------------|----------------------------------------------|------------------------------------------|-------------------------------------------------------------------------------------------------------|--------------------------------------------------------------------------------------------|
| Saptharishi                       | Lalgudi Ganesan |                       |                  | University of Western Ontario                | London, ON, Canada                       | Data governance team member / POPCORN & CURNLS site PI - LHSC / Central Site Rep Scientific committee |                                                                                            |
| Marc- André                       | Langlois        |                       |                  | University of Ottawa                         | Ottawa, ON, Canada                       | Biobank governance team member                                                                        |                                                                                            |
| Nicole                            | Le Saux         |                       |                  | University of Ottawa                         | Ottawa, ON, Canada                       | ID/IMPACT site lead                                                                                   |                                                                                            |
| Laurie                            | Lee             |                       |                  | University of Calgary                        | Calgary, AB, Canada                      | CCCTG site lead                                                                                       |                                                                                            |
| Kirk                              | Leifso          |                       |                  | Queen's University                           | Kinston, ON, Canada                      | ID/IMPACT site lead                                                                                   |                                                                                            |
| Patricia                          | Li              |                       |                  | McGill University                            | Montreal, QC, Canada                     | EDI + I director / Scientific committee member                                                        |                                                                                            |
| Andrea                            | Linares         |                       |                  | Maternal Infant Child Youth Research Network | Calgary, AB, Canada                      | MICYRN Clinical Research Project Manager                                                              |                                                                                            |
| Sanjay                            | Mahant          |                       |                  | University of Toronto                        | Toronto, ON, Canada                      | Inpatient medicine Pillar lead / Scientific committee member                                          |                                                                                            |
| Isabelle                          | Marc            |                       |                  | Laval University                             | Quebec city, QC, Canada                  | PIRN site lead                                                                                        |                                                                                            |
| Ahmed                             | Mater           |                       |                  | University of Saskatchewan                   | Saskatoon, SK, Canada                    | POPCORN & CURNLS site PI - JPCH                                                                       |                                                                                            |
| James                             | McNally         |                       |                  | University of Ottawa                         | Ottawa, ON, Canada                       | Knowledge mobilization team member / PICU Rep                                                         |                                                                                            |
| Garth                             | Meckler         |                       |                  | University of British Columbia               | Vancouver, BC, Canada                    | Longterm Outcomes Project team member / Co-A UBC                                                      |                                                                                            |
| Shaun                             | Morris          |                       |                  | University of Toronto                        | Toronto, ON, Canada                      | Acute COVID Project team member and POPCORN site PI - Sickkids                                        |                                                                                            |
| Haifa                             | Mtaweh          |                       |                  | University of Toronto                        | Toronto, ON, Canada                      | CCCTG site lead                                                                                       |                                                                                            |
| Srin                              | Murthy          |                       |                  | University of British Columbia               | Vancouver, BC, Canada                    | Data governance team member / Governance Committee Co-chair                                           |                                                                                            |
| Fiona                             | Muttalib        |                       |                  | University of British Columbia               | Vancouver, BC, Canada                    | Vaccine Safety Project team member / CURNLS site PA - CWBC / Western Site Rep Scientific committee    |                                                                                            |
| Leigh- Anne                       | Newhook         |                       |                  | Memorial University                          | St-John's, NL, Canada                    | PIRN site lead                                                                                        |                                                                                            |
| Jessica                           | Nicoll          |                       |                  | Memorial University                          | St-John's, NL, Canada                    | CCCTG site lead                                                                                       |                                                                                            |

## Supplemental Online Content: Pediatric Outcomes Improvement Through Coordination of Research Networks (POPCORN) Investigators

| *First Name and Middle Initial(s) | *Last Name       | *Suffix (eg, Jr, III) | Academic Degrees | Institution                                  | Location (city, state/province, country) | Role or Contribution, eg, chair, principal investigator                                | Group (if more than 1 Group listed in the byline) and/or Subgroup (eg, Steering Committee) |
|-----------------------------------|------------------|-----------------------|------------------|----------------------------------------------|------------------------------------------|----------------------------------------------------------------------------------------|--------------------------------------------------------------------------------------------|
| Nathalie                          | Orr-Gaucher      |                       |                  | University of Montreal                       | Montreal, QC, Canada                     | Vaccine Safety Project team member                                                     |                                                                                            |
| Joseph                            | Pagano           |                       |                  | University of Alberta                        | Edmonton, AB, Canada                     | Vaccine Safety Project team member / Co-A Stollery                                     |                                                                                            |
| Anna                              | Pangilinan       |                       |                  | Maternal Infant Child Youth Research Network | Vancouver, BC, Canada                    | MICYRN Administrative Assistant                                                        |                                                                                            |
| Jesse                             | Papenburg        |                       |                  | McGill University                            | Montreal, QC, Canada                     | Indirect Consequences Project team member and POPCORN site PI - HME / IMPACT Rep - HME |                                                                                            |
| Jeffrey                           | Pernica          |                       |                  | McGill University                            | Montreal, QC, Canada                     | ID/IMPACT site lead                                                                    |                                                                                            |
| Naveen                            | Poonai           |                       |                  | University of Western Ontario                | London, ON, Canada                       | Vaccine Safety Project team member / Co-A Western                                      |                                                                                            |
| Elodie                            | Portales-Casamar |                       |                  | University of Montreal                       | Montreal, QC, Canada                     | Data governance co-lead / Scientific committee member                                  |                                                                                            |
| Robert                            | Porter           |                       |                  | Memorial University                          | St-John's, NL, Canada                    | PERC site lead                                                                         |                                                                                            |
| Rupeena                           | Purewal          |                       |                  | University of Saskatchewan                   | Saskatoon, SK, Canada                    | ID/IMPACT site lead                                                                    |                                                                                            |
| Paula                             | Robeson          |                       |                  | Children's Healthcare Canada                 | Ottawa, ON, Canada                       | Knowledge User/KM team                                                                 |                                                                                            |
| Joan                              | Robinson         |                       |                  | University of Alberta                        | Edmonton, AB, Canada                     | Mentorship and training team member / Co-A UofA                                        |                                                                                            |
| Manish                            | Sadarangani      |                       |                  | University of British Columbia               | Vancouver, BC, Canada                    | Infectious diseases Pillar lead / Scientific committee member                          |                                                                                            |
| Marina                            | Salvadori        |                       |                  | McGill University                            | Montreal, QC, Canada                     | PHAC rep on Scientific committee/ Knowledge user / Co-A PHAC                           |                                                                                            |
| Susan                             | Samuel           |                       |                  | University of Calgary                        | Calgary, AB, Canada                      | Mentorship and training team member / Collab. UofC                                     |                                                                                            |
| Shannon                           | Scott            |                       |                  | University of Alberta                        | Edmonton, AB, Canada                     | KM Expert - ARCHE                                                                      |                                                                                            |
| Anupam                            | Sehgal           |                       |                  | Queen's University                           | Kingston, ON, Canada                     | POPCORN & CURNLS site PI - KHSC                                                        |                                                                                            |
| Archna                            | Shah             |                       |                  | Memorial University                          | St-John's, NL, Canada                    | POPCORN & CURNLS Site PI - JCH                                                         |                                                                                            |
| Tatiana                           | Sotindjo         |                       |                  | University of British Columbia               | Vancouver, BC, Canada                    | EDI + I team member / Co-A UBC                                                         |                                                                                            |
| Carla                             | Southward        |                       |                  | University of Toronto                        | Toronto, ON, Canada                      | Patient engagement team member / Patient Engagement Coordinator - SickKids             |                                                                                            |
| Taylor                            | Stoesz           |                       |                  | McGill University                            | Montreal, QC, Canada                     | EDI + I team member / Co-A McGill                                                      |                                                                                            |

Supplemental Online Content: Pediatric Outcomes Improvement Through Coordination of Research Networks (POPCORN) Investigators

| *First Name and Middle Initial(s) | *Last Name | *Suffix (eg, Jr, III) | Academic Degrees | Institution                                                       | Location (city, state/province, country) | Role or Contribution, eg, chair, principal investigator                             | Group (if more than 1 Group listed in the byline) and/or Subgroup (eg, Steering Committee) |
|-----------------------------------|------------|-----------------------|------------------|-------------------------------------------------------------------|------------------------------------------|-------------------------------------------------------------------------------------|--------------------------------------------------------------------------------------------|
| Robert                            | Strang     |                       |                  | Chief Medical Officers Health - Department of Health and Wellness | Halifax, NS, Canada                      | Principal knowledge user                                                            |                                                                                            |
| Shazeen                           | Suleman    |                       |                  | St. Michael's Hospital Toronto                                    | Toronto, ON, Canada                      | EDI + I team member / Co-A St. Michael's Hospital Toronto                           |                                                                                            |
| Peter                             | Szatmari   |                       |                  | University of Toronto                                             | Toronto, ON, Canada                      | Mental Health expert                                                                |                                                                                            |
| Sepi                              | Taheri     |                       |                  | University of Western Ontario                                     | London, ON, Canada                       | PIRN site lead                                                                      |                                                                                            |
| Jennifer                          | Tam        |                       |                  | University of British Columbia                                    | Vancouver, BC, Canada                    | Mentorship and training team member / co-A UBC                                      |                                                                                            |
| Roseline                          | Thibeault  |                       |                  | Laval University                                                  | Quebec city, QC, Canada                  | ID/IMPACT site lead                                                                 |                                                                                            |
| Karina                            | Top        |                       |                  | Dalhousie University                                              | Halifax, NS, Canada                      | Vaccine Safety Project lead / Scientific committee member                           |                                                                                            |
| Krystel                           | Toulouse   |                       |                  | Université de Sherbrooke                                          | Sherbrooke, QC, Canada                   | POPCORN site PI - CHUSB                                                             |                                                                                            |
| Sze-Man                           | Tse        |                       |                  | University of Montreal                                            | Montreal, QC, Canada                     | Biobank governance team member                                                      |                                                                                            |
| Anupma                            | Wadhwa     |                       |                  | University of Toronto                                             | Toronto, ON, Canada                      | Longterm Outcomes Project team member                                               |                                                                                            |
| Gita                              | Wahi       |                       |                  | McMaster University                                               | Hamilton, ON, Canada                     | Indirect Consequences Project team member and POPCORN & CURNLS site PA - MCH        |                                                                                            |
| Sam                               | Wong       |                       |                  | University of Alberta                                             | Edmonton, AB, Canada                     | EDI + I team member / Co-A UofA                                                     |                                                                                            |
| Bruce                             | Wright     |                       |                  | University of Alberta                                             | Edmonton, AB, Canada                     | POPCORN & CURNLS site PI - SCH                                                      |                                                                                            |
| Rae                               | Yeung      |                       |                  | University of Toronto                                             | Toronto, ON, Canada                      | Vaccine Safety Project team member / Co-A Sickkids / Biobank governance team member |                                                                                            |
