# Supplementary material for: Pandemic Stringency Measures and Hospital Admissions for Eating Disorders
Source: PubMed Central journal article supplement (PMC11231909; doi:10.1001/jamapediatrics.2024.2044), 2024-07-08
Supplement: jamapediatr-e242044-s003.pdf [file jamapediatr-e242044-s003.pdf]

## Data Sharing Statement

Roumeliotis. Pandemic Stringency Measures and Hospital Admissions for Eating Disorders. *JAMA Pediatr*. Published July 08, 2024. doi:10.1001/jamapediatrics.2024.2044

### Data

**Data available:** No

### Additional Information

**Explanation for why data not available:** Health administrative data for this study was provided by the Canadian Institut for Health Information (CIHI) under strict access in a secure environment. Individual record level data sharing is not permitted by CIHI, however aggregate data can be made available upon request to primary authors, with agreements from POPCORN network and CIHI respected.
